# Supplementary material
Source: publisher site journal article supplement (https://www.dovepress.com/article/464519)
Supplement: Supplementary file 1 [file get_supplementary_file.php]

**
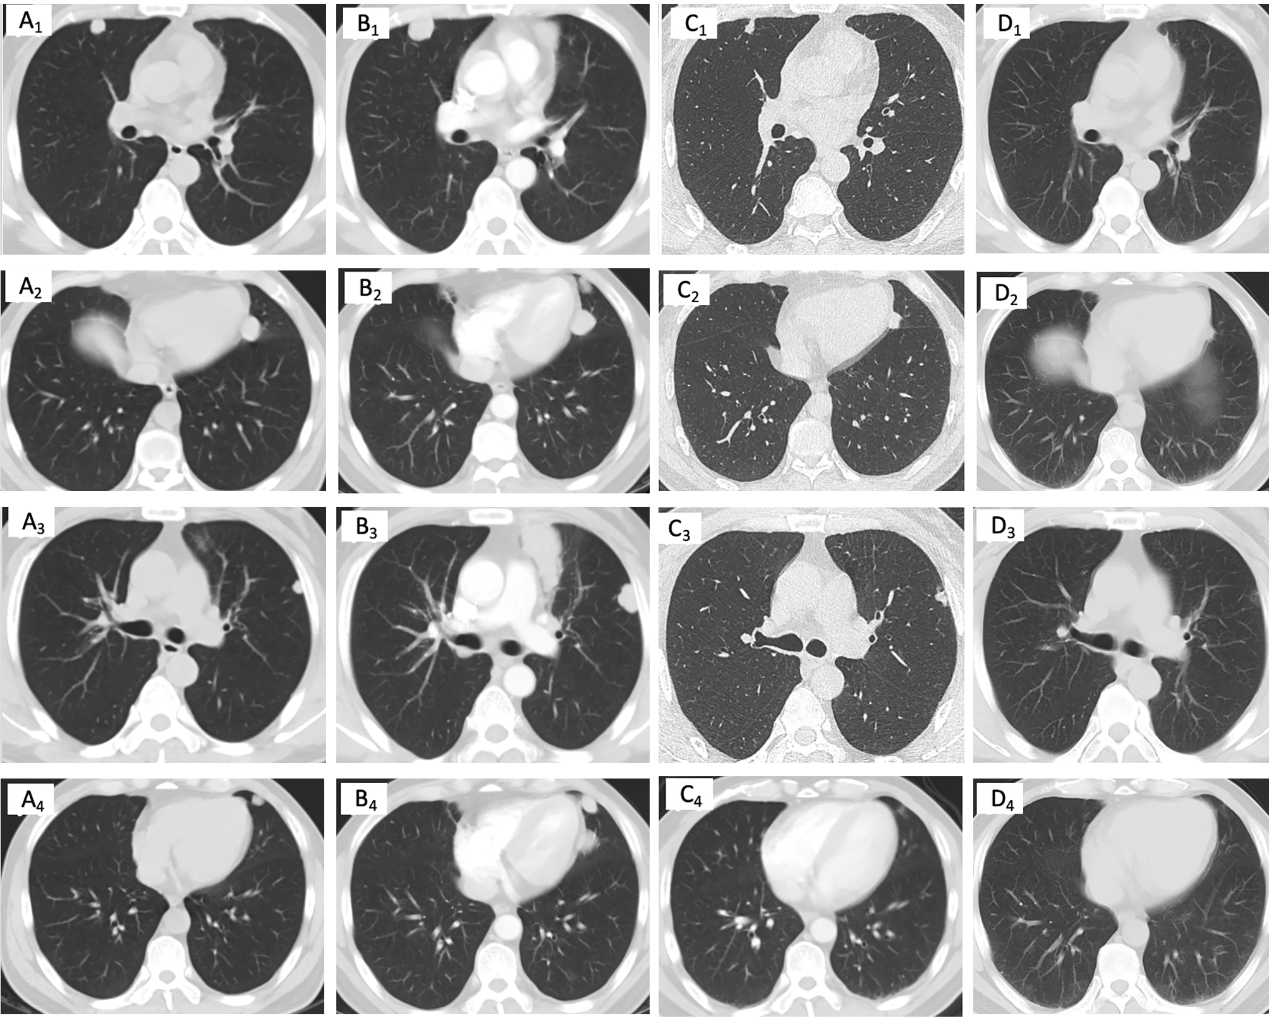
**

**Figure S1:** (A) The postoperative follow-up (May 2018) showed tumor recurrence in the lungs, A1-4 showed another four metastatic lesions; (B) At the end of the last chemotherapy of arsenic trioxide and before the treatment of tislelizumab (October 2018). B1-4 showed another four metastatic lesions, the largest measuring 5.4x3.2 cm located in anterior segment of left upper lobe; (C): C1-4 showed another four lesions were obviously diminished after 2 cycles of treatment with tislelizumab (January 2019). The efficacy was first evaluated as a partial response; (D) D1-4 showed that the other four lesions nearly disappeared. The efficacy was first evaluated as a complete response after 12 cycles of treatment with tislelizumab (July 2019)
